# Supplementary material for: A wide-bandgap graphene-like structure C6BN with ultra-low dielectric constant
Source: Royal Society of Chemistry journal article supplement (doi:10.1039/d4cp01511h), 2024-01-01
Supplement: d4cp01511h1.pdf [file d4cp01511h1.pdf]

## Supplemental Information

### A Wide-Bandgap Graphene-like Structure C<sub>6</sub>BN with Ultra-Low Dielectric Constant

Mengyang Li,<sup>a,b,†</sup> Yuqi Zhou,<sup>a,†</sup> Bei Liu,<sup>a</sup> Qun Wei,<sup>a</sup> Siying Shao,<sup>a</sup> Kun Yuan,<sup>c</sup>

Bing Wei,<sup>a,\*</sup> Jincheng Zhang,<sup>b,\*</sup>

<sup>a</sup> School of Physics, Xidian University, Xi'an, 710071, China

<sup>b</sup> National Key Laboratory of Wide Bandgap Semiconductor Devices and Integrated Technology, School of Microelectronics, Xidian University, Xi'an, 710071, China

<sup>c</sup> College of Chemical Engineering and Technology, Tianshui Normal University, Tianshui 741001, China

\* Corresponding Authors: [jchzhang@xidian.edu.cn](mailto:jchzhang@xidian.edu.cn) (J.C. Zhang);

[bwei@xidian.edu.cn](mailto:bwei@xidian.edu.cn) (B. Wei);

† These authors equally contribute to this work.

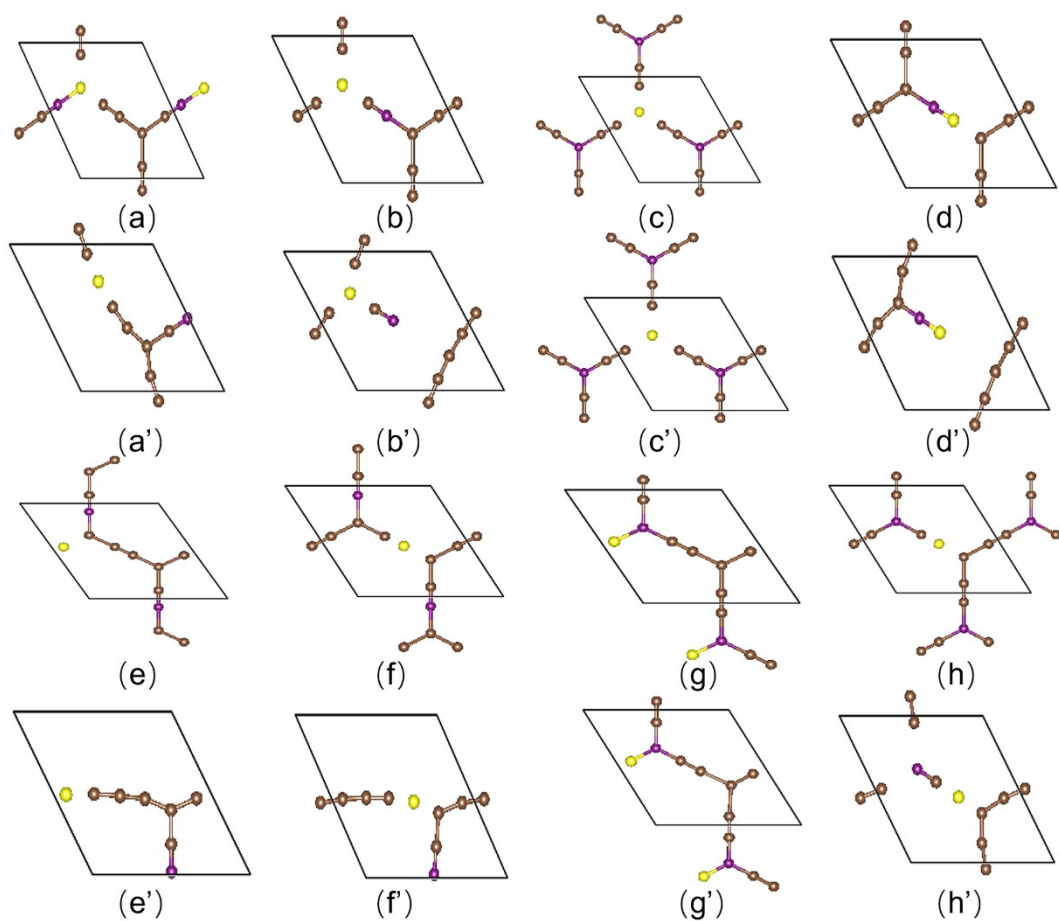

**Fig. S1** Top view structure of eight models for  $C_6BN$  isomers without optimization from (a) to (h) and after optimization from (a') to (h'). The carbon, nitrogen, and boron atoms are in brown, purple, and golden yellow, respectively. The primitive cell is marked by the red box for  $C_6BN$  isomers and  $C_8$ .

Table S1 Stiffness matrixes in N/m of C<sub>6</sub>BN.

|          | $C_{1j}$ | $C_{2j}$ | $C_{3j}$ |
|----------|----------|----------|----------|
| $C_{i1}$ | 130.151  | 42.560   | 0        |
| $C_{i2}$ | 42.560   | 130.151  | 0        |
| $C_{i3}$ | 0        | 0        | 43.795   |

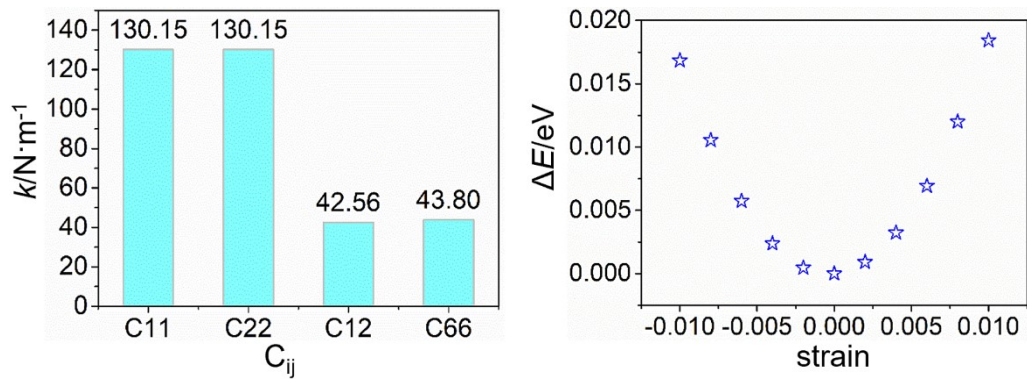

**Fig. S2** Stiffness matrixes in N/m of  $\text{C}_6\text{BN}$  and the change in energy with different strain.
